# Supplementary material for: Structural analysis of the evolution of steroid specificity in the mineralocorticoid and glucocorticoid receptors
Source: PubMed Central journal article supplement (PMC1805736; doi:10.1186/1471-2148-7-24), 2007-02-16

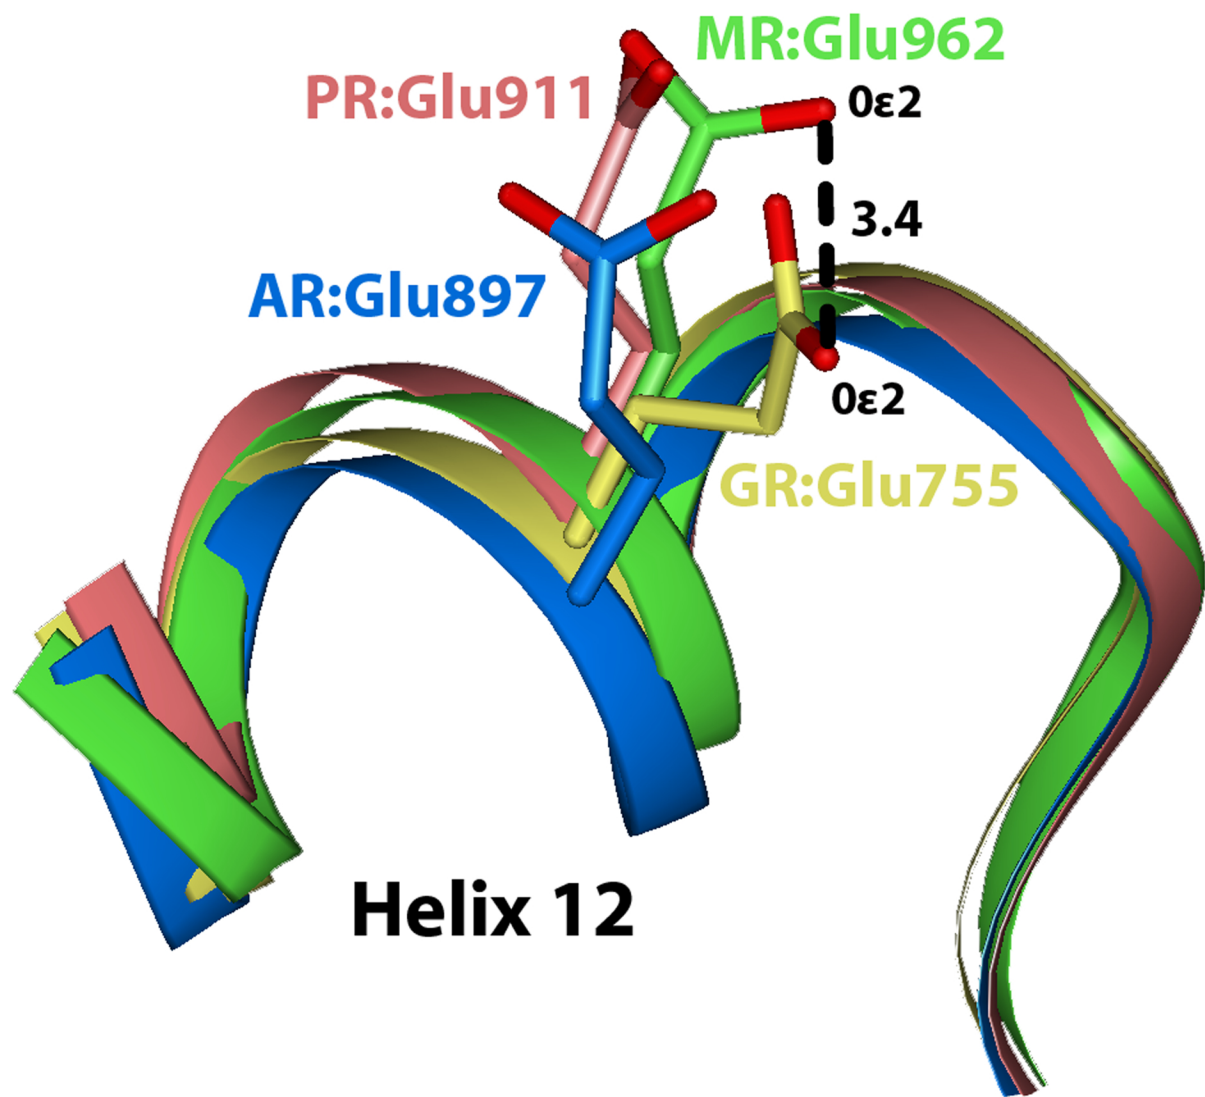

Supplement: 1471-2148-7-24-S1.pdf [file 1471-2148-7-24-S1.pdf]
